# Supplementary material for: WTAP promotes myocardial ischemia/reperfusion injury by increasing endoplasmic reticulum stress via regulating m6A modification of ATF4 mRNA
Source: Aging (Albany NY). 2021 Mar 26;13(8):11135–49. doi: 10.18632/aging.202770 (PMC8109143; doi:10.18632/aging.202770)
Supplement: Supplementary Figures [file aging-13-202770-s001.pdf]

## SUPPLEMENTARY FIGURES

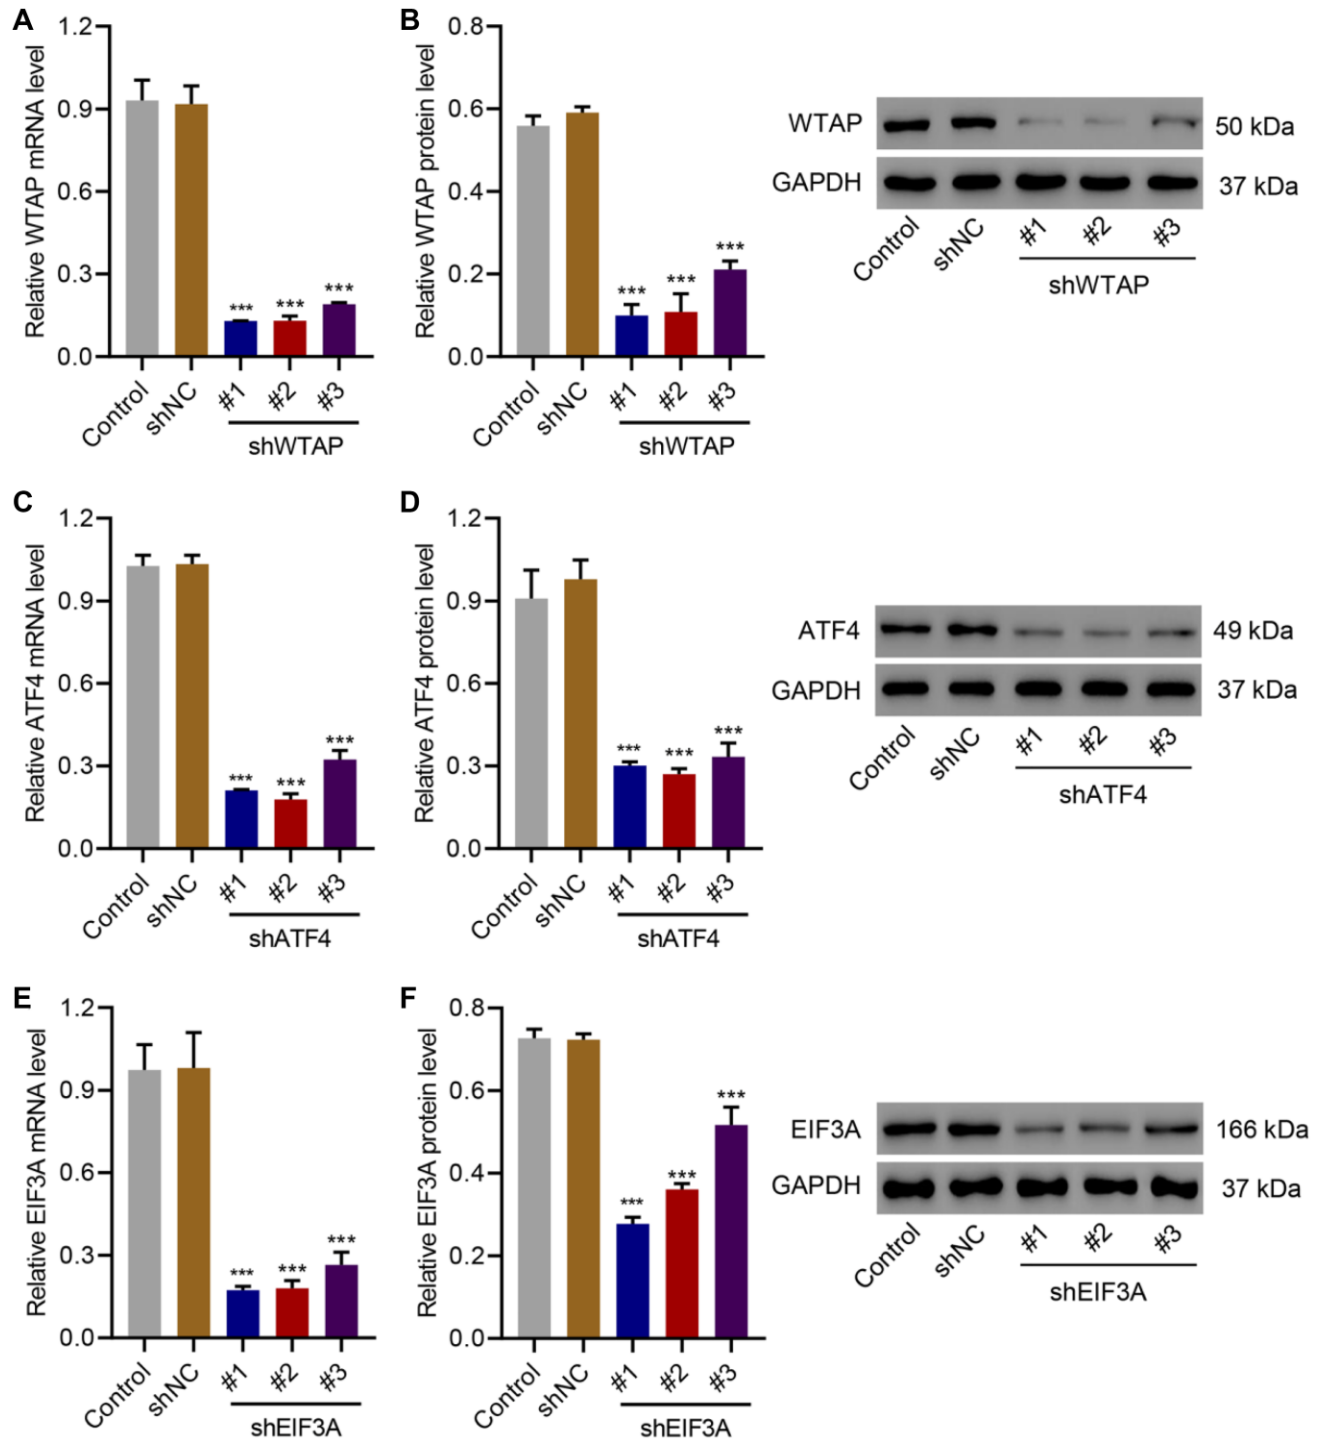

**Supplementary Figure 1. Knockdown of WTAP, ATF4, or EIF3A in AC16 cells.** Relative mRNA and protein levels of (A, B) WTAP, (C, D) ATF4, and (E, F) EIF3A. All experiments were repeated at least three times, and data are represented as mean  $\pm$  SD. \*\*\* $P < 0.001$  compared with shNC.

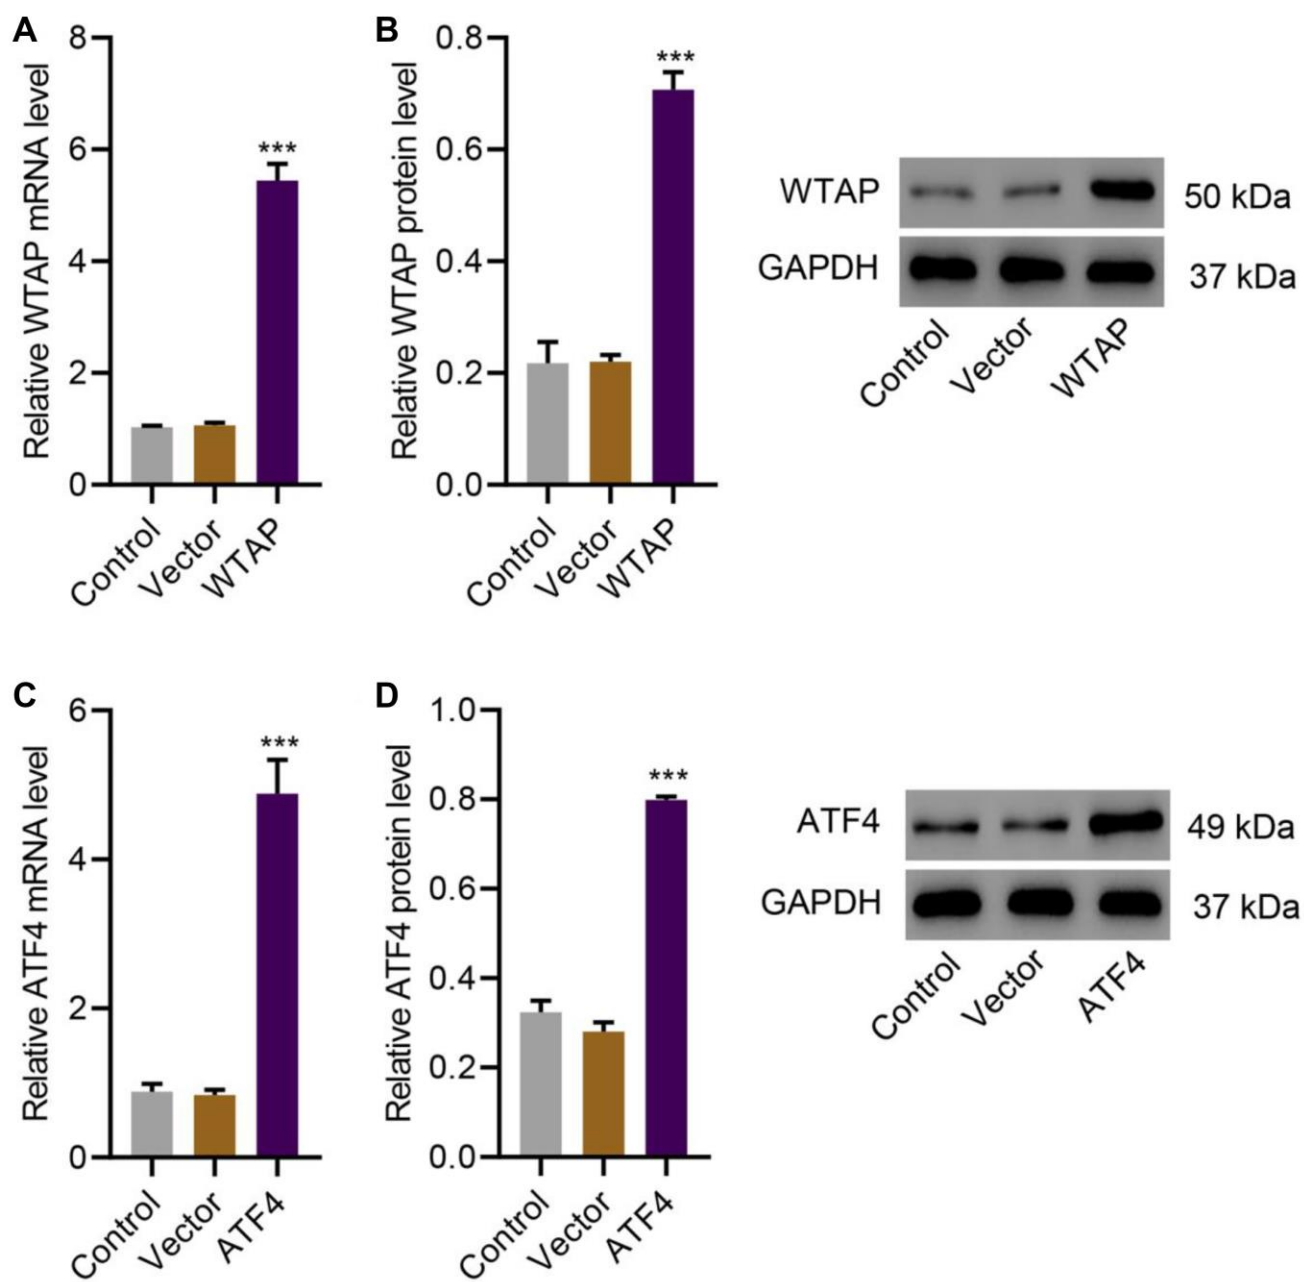

**Supplementary Figure 2. WTAP or ATF4 overexpression in AC16 cells.** Relative mRNA and protein levels of (A, B) WTAP and (C, D) ATF4. All experiments were repeated at least three times, and data are represented as mean  $\pm$  SD. \*\*\* $P < 0.001$  compared with vector.
